# Supplementary material for: Comparison of surface techniques for the discrimination of polymorphs
Source: Royal Society of Chemistry journal article supplement (doi:10.1039/c6ce01096b), 2016-01-01
Supplement: c6ce01096b1.pdf [file c6ce01096b1.pdf]

## Comparison of Surface Techniques for the Discrimination of Polymorphs

Ranjit Thakuria,<sup>a,e</sup> Mark D. Eddleston,<sup>a</sup> Ernest H. H. Chow,<sup>a,b</sup> Lisa J. Taylor,<sup>b</sup> Barry J. Aldous,<sup>c</sup> Joseph F. Krzyzaniak,<sup>d</sup> and William Jones<sup>a,\*</sup>

<sup>a</sup> Department of Chemistry, University of Cambridge, Lensfield Road, Cambridge CB2 1EW, UK

<sup>b</sup> The Pfizer Institute for Pharmaceutical Material Science, Pfizer, Sandwich, UK

<sup>c</sup> Novartis, San Carlos, CA, USA

<sup>d</sup> The Pfizer Institute for Pharmaceutical Material Science, Pfizer, Groton, CT, USA

<sup>e</sup> Department of Chemistry, Gauhati University, Guwahati-781014, Assam, India

### Supporting Information

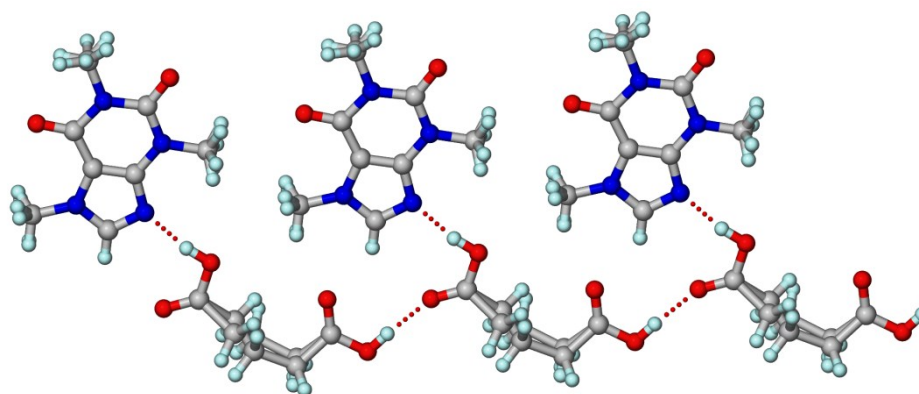

(a)

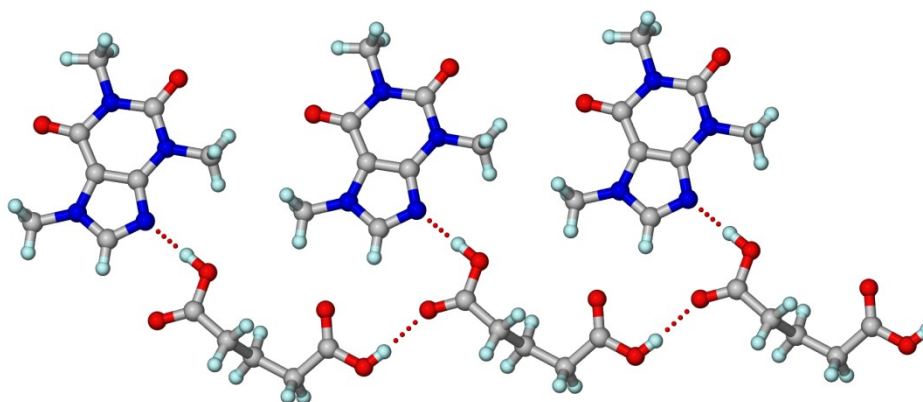

(b)

**Figure S1** Linear chain of hydrogen bond interaction present in caffeine-glutaric acid cocrystal (a) form I viewed along the *b* axis and (b) form II viewed along the *a* axis.

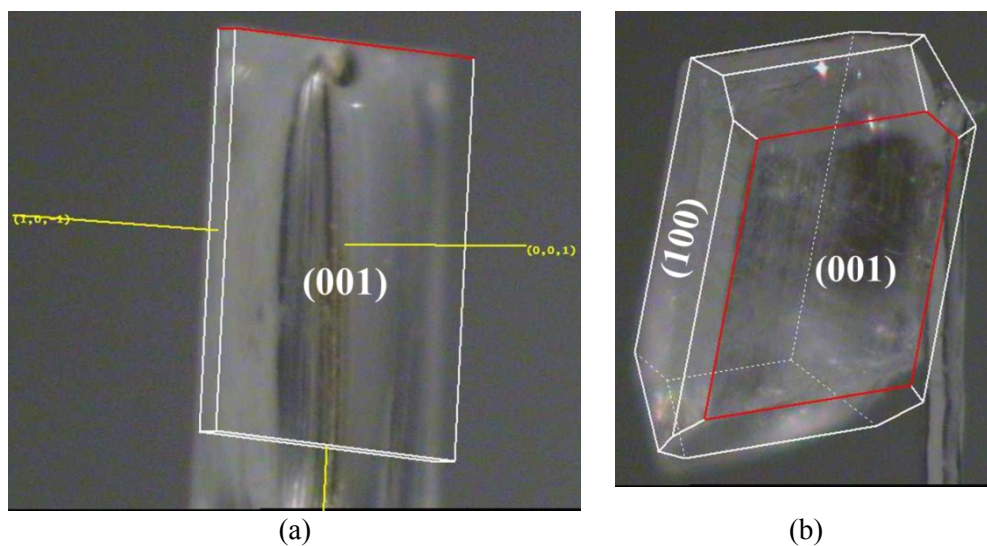

**Figure S2** Face indexed image of (a) form I and (b) form II crystals of caffeine-glutaric acid cocrystal polymorph.

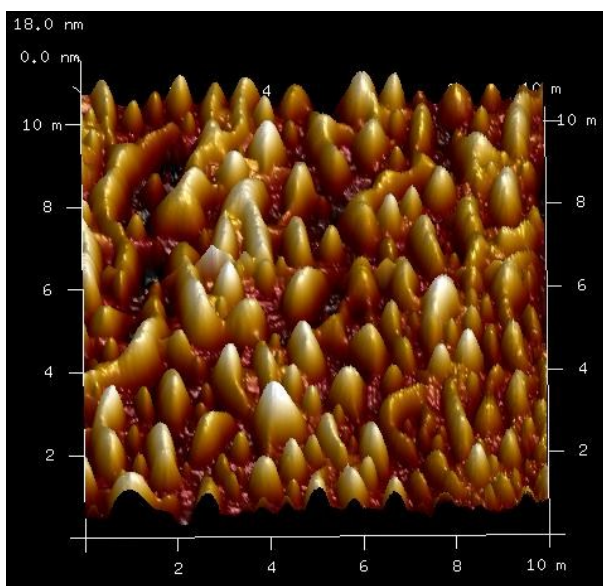

**Figure S3** AFM height image of uncleaved form II crystal of caffeine-glutaric acid.

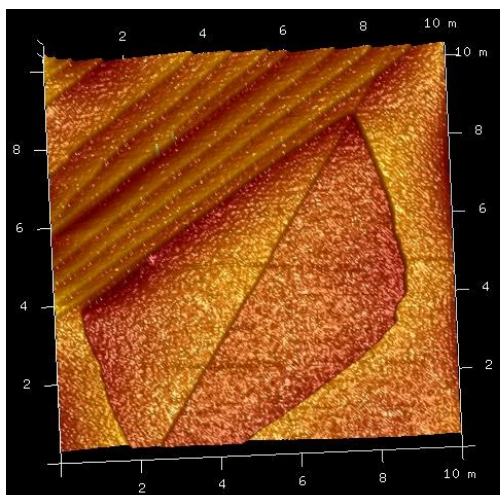

(a)

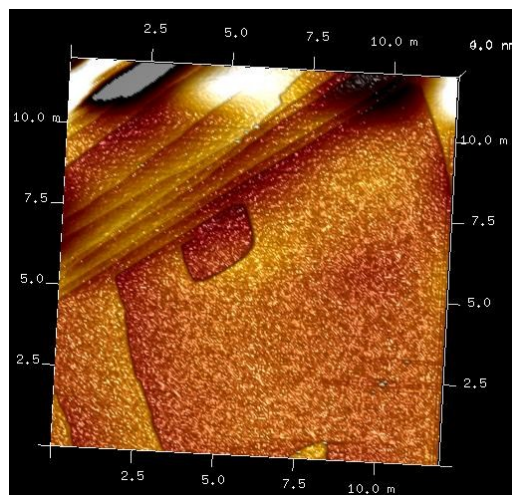

(b)

**Figure S4** Height image of (a) edge dislocation and (b) screw dislocation observed in cleaved form II crystals of caffeine-glutaric acid under AFM.
